# Supplementary material for: Sensing mechanism of a new fluorescent probe for hydrogen sulfide: photoinduced electron transfer and invalidity of excited-state intramolecular proton transfer
Source: Royal Society of Chemistry journal article supplement (doi:10.1039/d1ra02511b), 2021-01-01
Supplement: d1ra02511b1.pdf [file d1ra02511b1.pdf]

## Supporting Information

Sensing Mechanism of a New Fluorescent Probe for Hydrogen Sulfide: Photoinduced Electron Transfer and Invalidity of Excited-State Intramolecular Proton Transfer

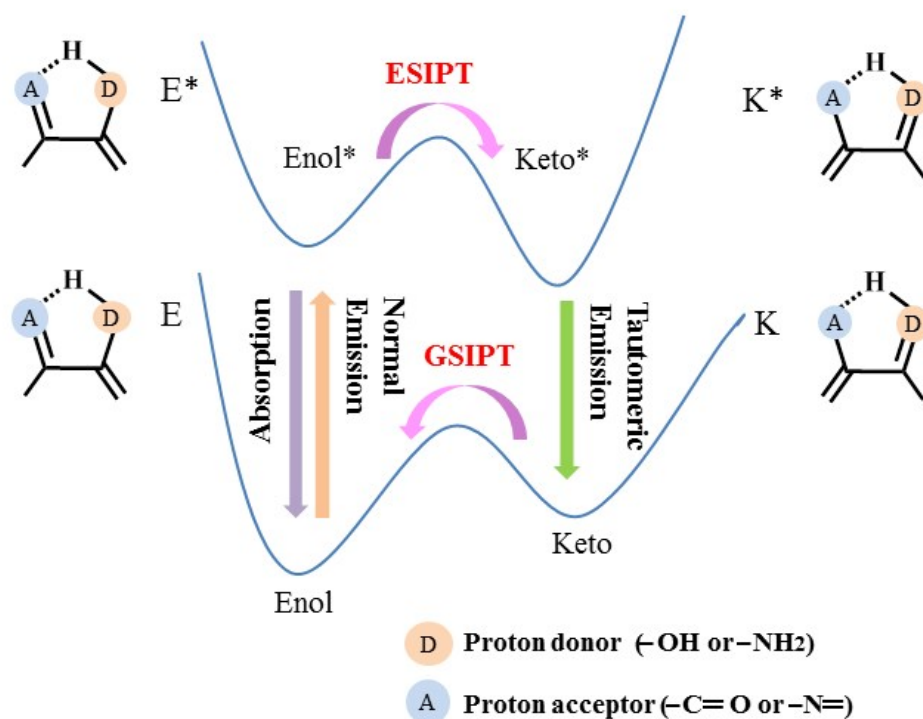

Figure S1. Diagram of the general ES IPT, a proton donor (-OH, -NH<sub>2</sub>), proton acceptor (-C=O, -N=) are circled with blue and red, respectively.

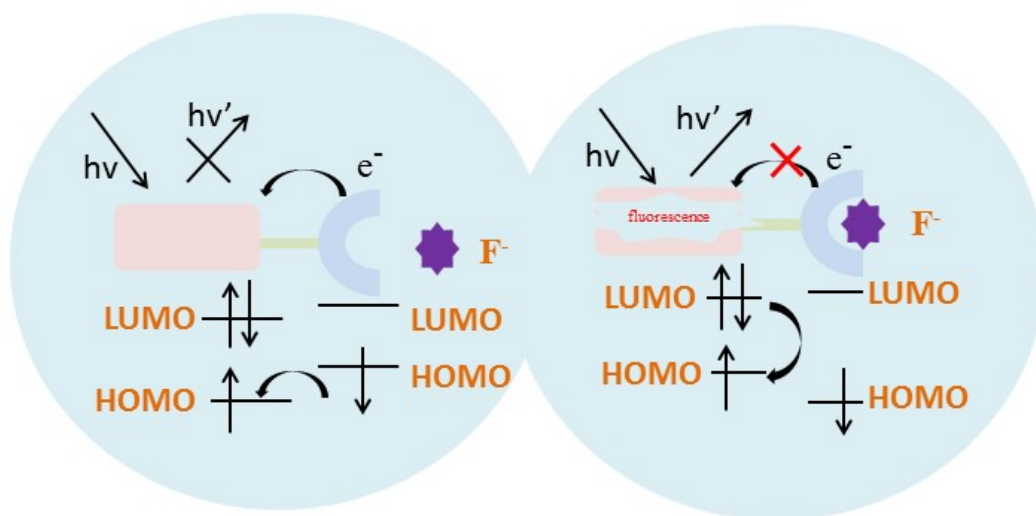

Figure S2. The Schematic of PET mechanisms. F<sup>-</sup> (fluorescent fluoride).
